# Supplementary material for: Hybrid PNA-peptide hydrogels as injectable CEST-MRI agents
Source: Royal Society of Chemistry journal article supplement (doi:10.1039/d4tb00358f), 2024-01-01
Supplement: d4tb00358f1.pdf [file d4tb00358f1.pdf]

## Supporting information

### Hybrid PNA-peptide hydrogels as injectable CEST-MRI agents

Elisabetta Rosa,<sup>‡,a</sup> Enza Di Gregorio,<sup>‡,b</sup> Giuseppe Ferrauto,<sup>b</sup> Carlo Diaferia,<sup>a</sup> Enrico Gallo,<sup>c</sup> Enzo Terreno<sup>\*,b</sup> and Antonella Accardo<sup>\*,a</sup>

<sup>a</sup>Department of Pharmacy and Interuniversity Research Centre on Bioactive Peptides (CIRPeB) “Carlo Pedone”, University of Naples “Federico II”, Via D. Montesano 49, Naples 80131, Italy.

E-mail: antonella.accardo@unina.it

<sup>b</sup>Molecular and Preclinical Imaging Center, Department of Molecular Biotechnology and Health Sciences, University of Turin, Via Nizza 52, Turin, Italy.

E-mail: enzo.terreno@unito.it

<sup>c</sup>IRCCS Synlab SDN, Via Gianturco 113, Naples, 80143, Italy

<sup>‡</sup>These authors have contributed equally.

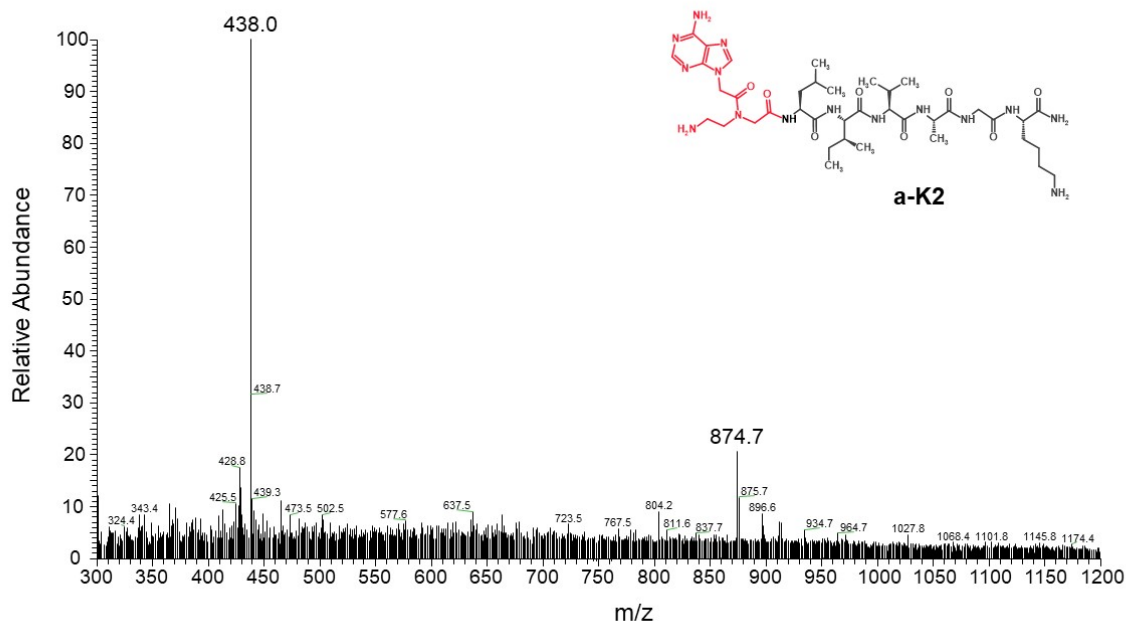

**Figure S1:** ESI mass spectrum of a-K2 peptide

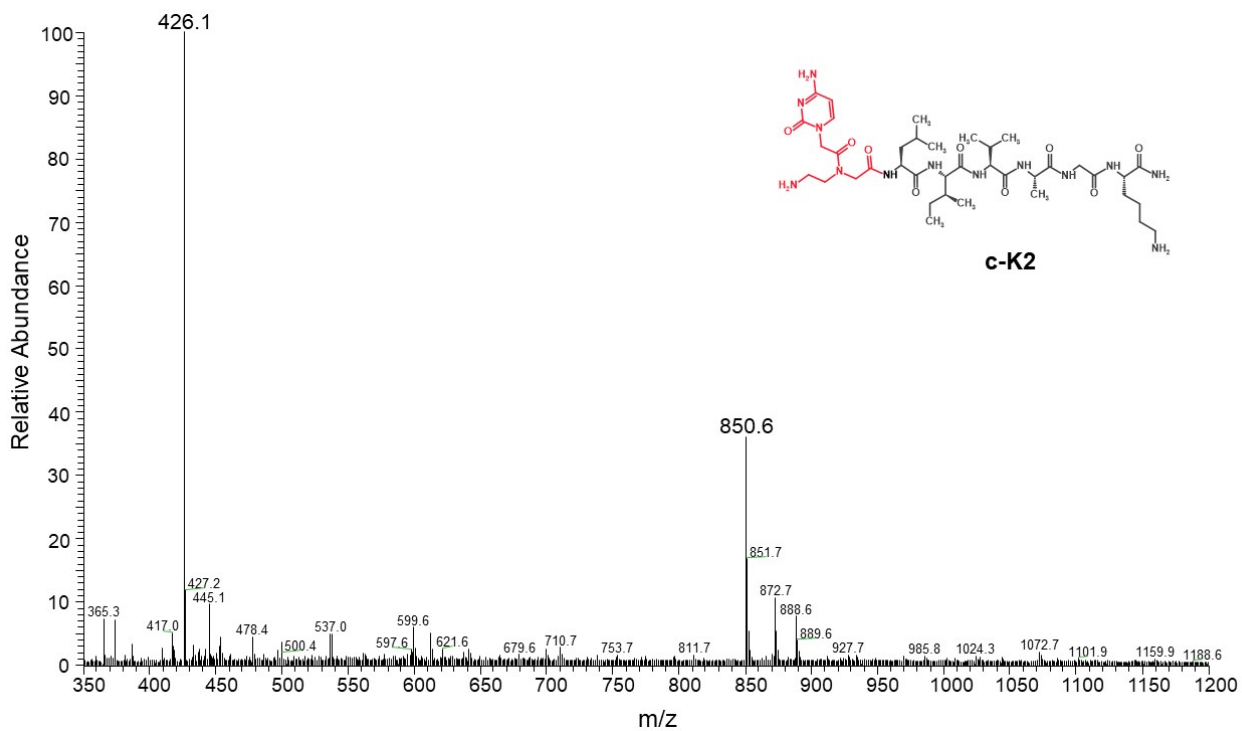

**Figure S2:** ESI mass spectrum of c-K2 peptide

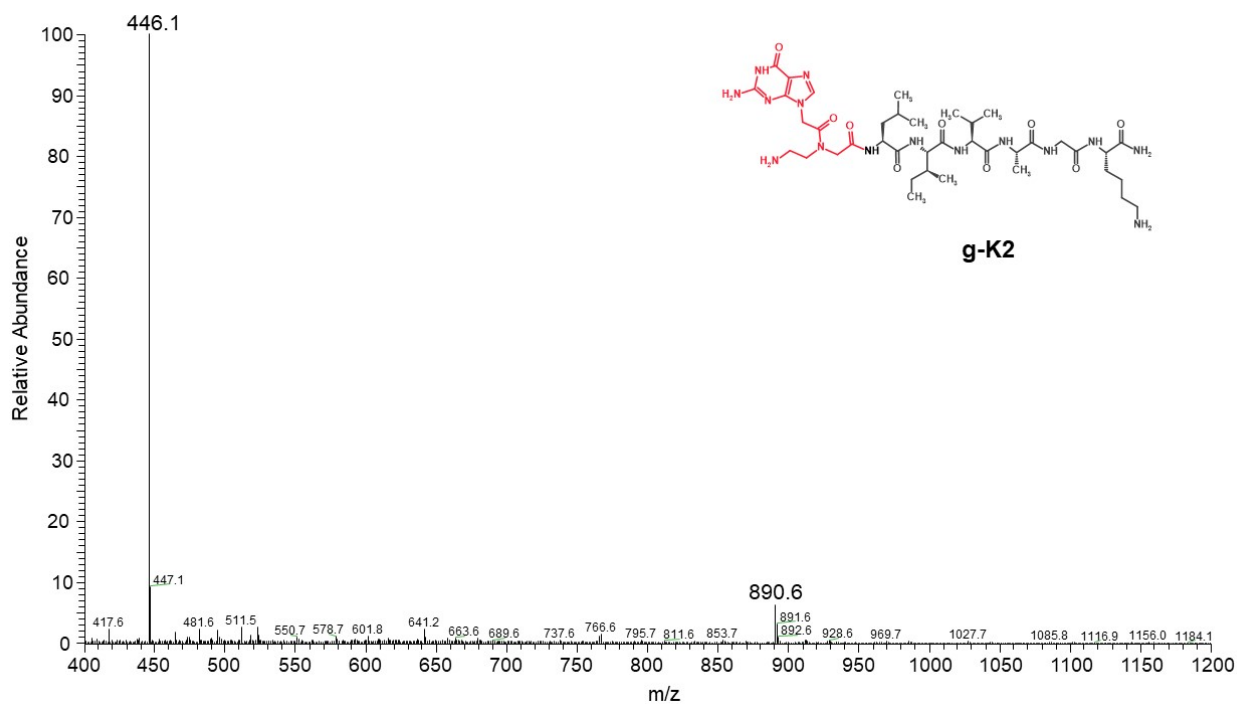

**Figure S3:** ESI mass spectrum of g-K2 peptide

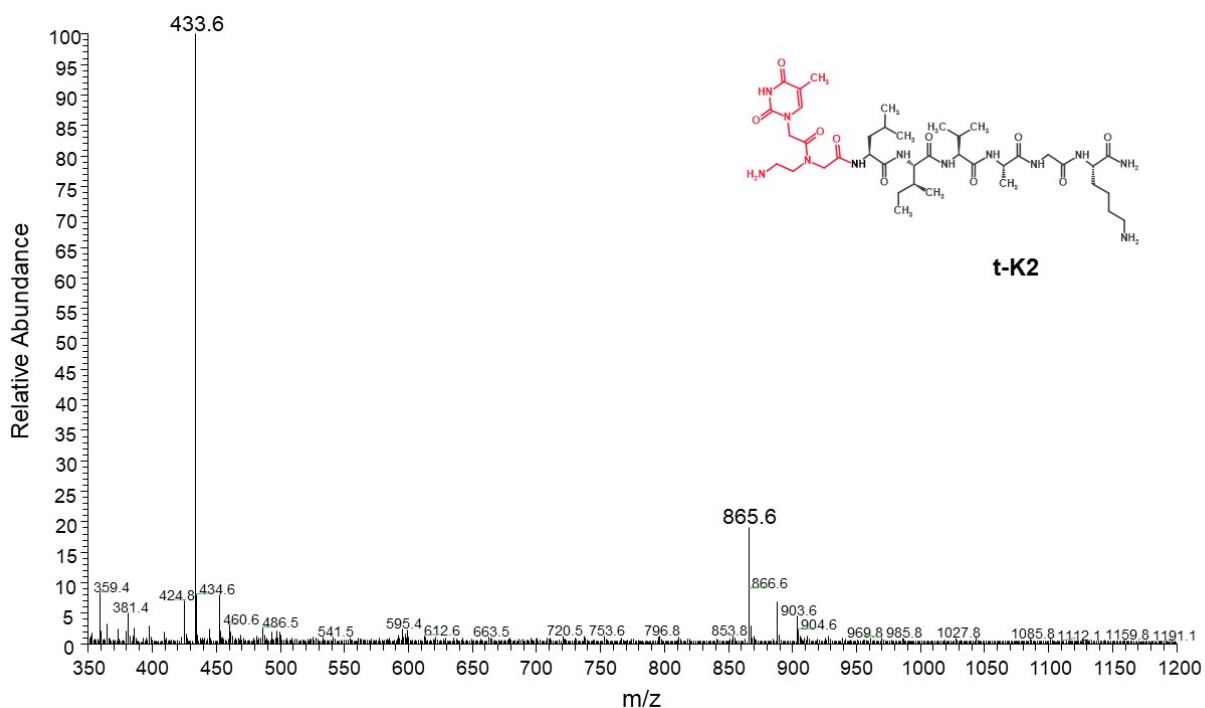

**Figure S4:** ESI mass spectrum of t-K2 peptide

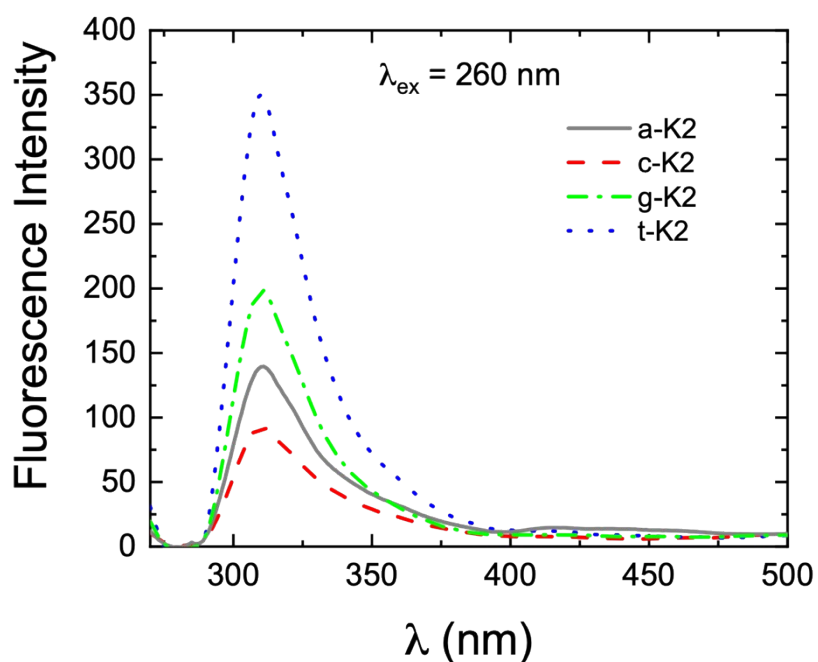

**Figure S5:** Fluorescence emission spectra of peptide solution (at a concentration of  $5 \cdot 10^{-6}$  M) excited at 260 nm.

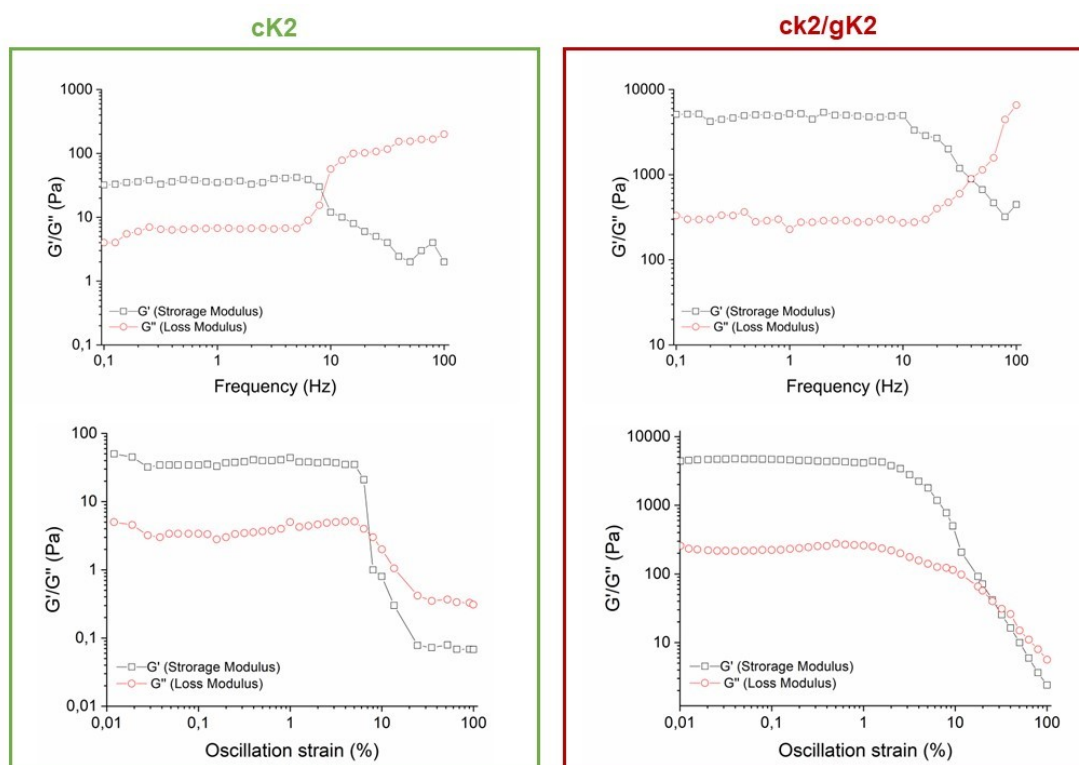

**Figure S6:** Frequency and oscillation strain sweeps for c-K2 and c-K2/g-K2 HGs.

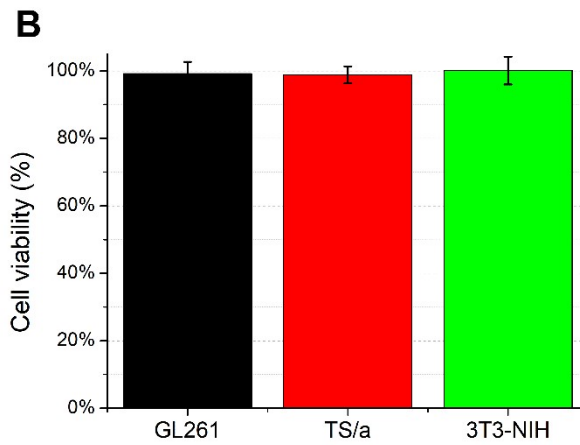

**Figure S7:** Cell viability assessed by MTT assay for GL261, TS/a and 3T3-NIH cells incubated in presence of medium conditioned with c-K2/g-K2 3% *w/v* mixed hydrogels.

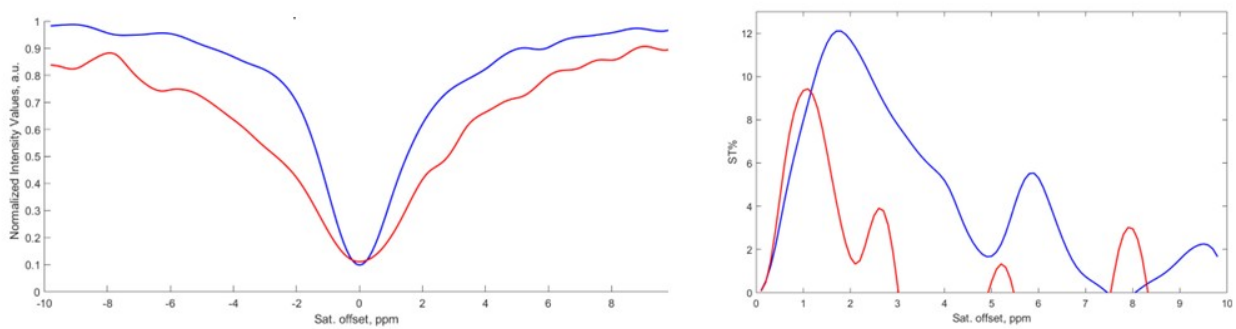

**Figure S8:** Z- and ST-spectra at  $t=0$  (blue line) and  $t=24h$  (red line) of c-K2/g-K2 3% *w/v* hydrogels implanted under the skin.

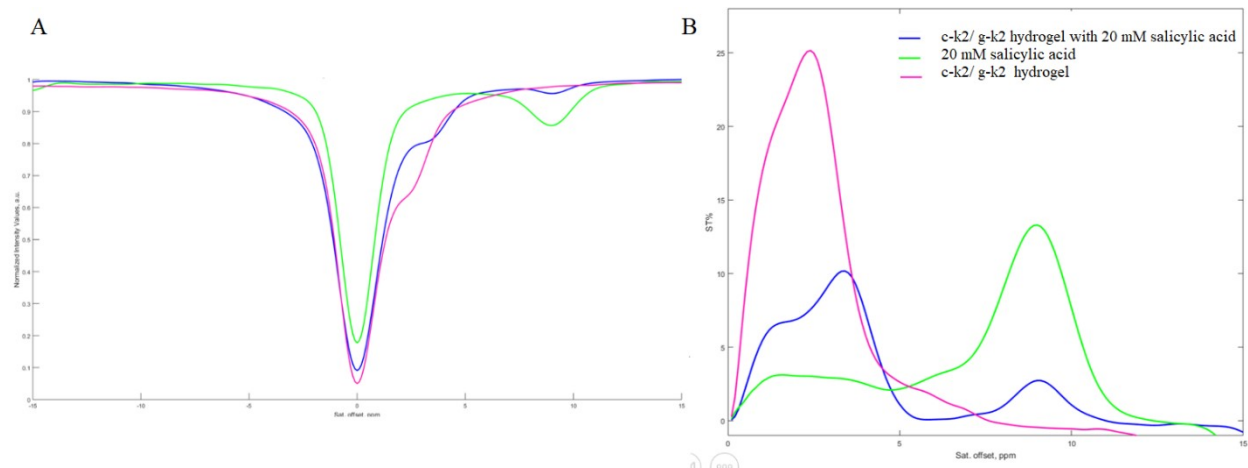

**Figure S9:** a) Z- and b) ST-spectra of c-K2/g-K2 3% w/v hydrogel in presence of salicylic acid (*blue line*) compared to free salicylic acid (*green line*) or empty hydrogel (*magenta line*).
